# Supplementary material
Source: PubMed Central journal article supplement (PMC2926956)
Supplement: supp_dev.048231_DEV048231tableS1.pdf [file supp_dev.048231_DEV048231tableS1.pdf]

**Table S1. Primers used for RT-PCR**

| Primer                  | Sequence (5' to 3')           |
|-------------------------|-------------------------------|
| <i>rp49</i> -forward    | ATCGGTTACGGATCGAACAAG         |
| <i>rp49</i> -reverse    | GTAAACGCGGTTCTGCAT            |
| <i>Barley</i> -forward  | GGAGGAAGAGCGTGTTGTAGG         |
| <i>Barley</i> -reverse  | ACAACACCGACATGCTCTACAG        |
| <i>White</i> -forward   | GCAACCAAGTAAATCAACTGC         |
| <i>White</i> -reverse   | GTTTTGGCACAGCACTTTGTG         |
| <i>bFtz-F1</i> -forward | TGGCGTACTTTTAGCGTCCT          |
| <i>bFtz-F1</i> -reverse | AATACAAGAATCGATCTTCAAGTGG     |
| <i>E74</i> -forward     | AACGTGCAATCTCTTGAAAGG         |
| <i>E74</i> -reverse     | AGATAAAGGTACTIONTAGAGAACGCAAC |
| <i>E93</i> -forward     | AGAACGCGTTGCTGAAGAAT          |
| <i>E93</i> -reverse     | GATTGCTCTGGCTGATCTCC          |
| <i>BR-C</i> -forward    | GCCCCTCAGTTCATCATGTC          |
| <i>BR-C</i> -reverse    | CTGCAACTGTGTGTTGAGACC         |
