# Supplementary material
Source: PubMed Central journal article supplement (PMC2926956)
Supplement: supp_dev.048231_DEV048231tableS2.pdf [file supp_dev.048231_DEV048231tableS2.pdf]

**Table S2. Stocks containing the *lacO-hsp26-hsp70* reporter transgene**

| Insertion stock | Cytological position | Nearest 5' gene | Nearest 3' gene |
|-----------------|----------------------|-----------------|-----------------|
| hsp26-4D5       | 4D5                  | 13.1 kb         | 9.1 kb          |
| hsp26-79D       | 79D                  | 13.5 kb         | 1.2 kb          |
| hsp26-87C       | 87C                  | ND              | ND              |

Distances are calculated from each end of the *lacO* repeat array to the transcription start of the adjacent gene. ND, Within a repeat, so nearest gene distance could not be determined.
